# Supplementary material
Source: publisher figshare collection journal article supplement (https://acs.figshare.com/ndownloader/files/34308533)
Supplement: Supplementary file 1 [file 34308533]

## *Supporting Information*

### **Heteroatom Doping-Induced Defected $\text{Co}_3\text{O}_4$ Electrode for High-Performance Lithium Oxygen Battery**

Peng Zhang, Zhongxiao Wang, Peng Wang, Xiaobin Hui, Danyang Zhao, Zhiwei Zhang\* and Longwei Yin\*

Key Laboratory for Liquid-Solid Structural Evolution and Processing of Materials, Ministry of Education, School of Materials Science and Engineering, Shandong University, Jinan 250061, P. R. China

Corresponding Authors:

Email: zhangzhiwei@sdu.edu.cn;

Email: yinlw@sdu.edu.cn. Tel.: + 86 531 88396970. Fax: + 86 531 88396970 (L. Yin).

## **Experimental section**

### **Materials synthesis**

#### **Synthesis of $\text{Co}_3\text{O}_4$**

The typical synthetic procedure of  $\text{Co}_3\text{O}_4$  was modified on the basis of the previous report.<sup>1-2</sup> Firstly, 0.036 mol cobalt nitrate hexahydrate ( $\text{Co}(\text{NO}_3)_2 \cdot 6\text{H}_2\text{O}$ ) and 0.009 mol sodium hydroxide ( $\text{NaOH}$ ) were dissolved in 30 ml and 5 ml of deionized water, respectively. After stirring for 0.5 h,  $\text{NaOH}$  solution was added into  $\text{Co}(\text{NO}_3)_2$  solution dropwise and the mixed solution went on stirring for another 0.5 h, following by transferring into a 50 mL Teflon-lined autoclave. The hydrothermal process was conducted at 180 °C for 6h. The obtained products were cleaned with ethanol and deionized water for several times, subsequently dried in a vacuum oven for 12 h at 80 °C.

#### **Synthesis of S- $\text{Co}_3\text{O}_4$ and P- $\text{Co}_3\text{O}_4$**

P- $\text{Co}_3\text{O}_4$  was fabricated through low-temperature phosphorization method, using sodium hypophosphite ( $\text{NaH}_2\text{PO}_2 \cdot \text{H}_2\text{O}$ ) as phosphorus source. Concretely, the obtained  $\text{Co}_3\text{O}_4$  product (50 mg) and  $\text{NaH}_2\text{PO}_2 \cdot \text{H}_2\text{O}$  (80 mg) were placed at two separated quartz boat with  $\text{NaH}_2\text{PO}_2 \cdot \text{H}_2\text{O}$  at the upstream side in a tube furnace. The samples were heated at 300 °C for 2 h with a ramp of 2 °C/min under slow argon gas flow, and cooled down naturally to room temperature. To prepare S- $\text{Co}_3\text{O}_4$ , S powder (60 mg) was used as S source via the same heating procedure. In order to avoid the influence of annealing, pure  $\text{Co}_3\text{O}_4$  sample was also heated at the same way without any  $\text{NaH}_2\text{PO}_2 \cdot \text{H}_2\text{O}$  and S powder.

## Materials Characterization

The morphology of samples and discharge product were identified by SU-70 field emission scanning electron microscope (FE-SEM-70) and high resolution transmission electron microscopy (HRTEM, JEM-2100 at an acceleration voltage of 200 kV) equipped with energy dispersive spectrometry (EDS). The sample for HRTEM was cut on Leica Ultracut UCT ultramicrotome (UC7) to reduce the thickness. The phase structure and chemical components were characterized by X-ray diffraction (XRD, Rigaku D/Max-KA diffractometer using Cu K $\alpha$  radiation ( $\lambda=1.5406$  Å)), X-ray photoelectron spectroscopy (XPS, ESCALAB 250 spectra with 150 W Al K $\alpha$  probe beam), Raman spectroscopy (JY HR800), ICP Optical emission spectrometer Varian 720-ES (ICP-ES) and Fourier transform infrared spectroscopy (FTIR, Bruker Vector 22 system). The electron spin resonance (ESR) spectra were recorded using a Bruker EMX spectrometer (X band) at room temperature.

## Electrochemical Measurements

The electrochemical performances of Co<sub>3</sub>O<sub>4</sub>, S-Co<sub>3</sub>O<sub>4</sub> and P-Co<sub>3</sub>O<sub>4</sub> were evaluated using 2032 coin-type cells with gas holes. The electrode was prepared by dissolving each of the as-prepared sample (50 wt%), carbon black (40 wt%) and polyvinylidene fluoride (PVDF, 10 wt%) in N-Methyl pyrrolidone (NMP) and dip-coating the obtained slurry on carbon paper. After drying at 80 °C for 24 h, the as-prepared electrode was assembled with Li metal anode, glass fiber separator (Whatman, GF/D) and organic electrolyte (1 M LiTFSI/TEGDME) in an argon-filled glove box (H<sub>2</sub>O < 0.5 ppm, O<sub>2</sub> < 0.5 ppm). The mass loading of cathode is about 1 mg cm<sup>-2</sup>. All of the electrochemical measurements were carried out under a 1.0-bar dry oxygen atmosphere (> 99.999%) at room temperature. Galvanostatic discharge profiles were measured on LAND CT2001A battery system (Wuhan, China) within the voltage window of 2.0-4.5 V. Cyclic voltammetry (CV, within the voltage window of 2.0-4.5 V at 0.1 mV s<sup>-1</sup> speed) and electrochemical impedance spectroscopy (EIS, in a frequency range of 0.01–10<sup>5</sup> Hz.) analysis were performed on an electrochemical workstation (PARSTAT2273).

## Computational Details

The Vo formation energy and LiO<sub>2</sub> adsorption energy on (100) plane of each samples were investigated using the Vienna ab initio simulation packages (VASP) with the projector augmented wave (PAW) method.<sup>3,4</sup> The exchange-correlation energy was described by the generalized gradient approximation Perdew-Burke-Ernzerhof (GGA-PBE). The simulated surfaces were separated by a vacuum slab of 15 Å in c-axis to avoid the interactions between the periodically repeated images. The plane wave kinetic energy cutoff and the convergence criterion were set to 420 eV and 1 × 10<sup>-6</sup> eV, respectively. The Brillouin zone was sampled by a 3 × 3 × 3 k-point mesh for crystals and slabs calculations. The atomic geometries were relaxed until Hellmann–Feynman forces on each atom are reduced to less than 0.05 eV Å<sup>-1</sup> during structure optimization. The adsorption energy ( $\Delta E_{\text{ads}}$ ) was denoted as:  $\Delta E_{\text{ads}} = E_{\text{sub+LiO}_2} - E_{\text{sub}} - E_{\text{LiO}_2}$ , where  $E_{\text{sub+LiO}_2}$  stands for the sum energy of the optimized substrate/LiO<sub>2</sub> system,  $E_{\text{sub}}$  and  $E_{\text{LiO}_2}$  are on behalf of the total energies of the bare substrate and isolated LiO<sub>2</sub>, respectively.

## *Supporting Figures and Tables*

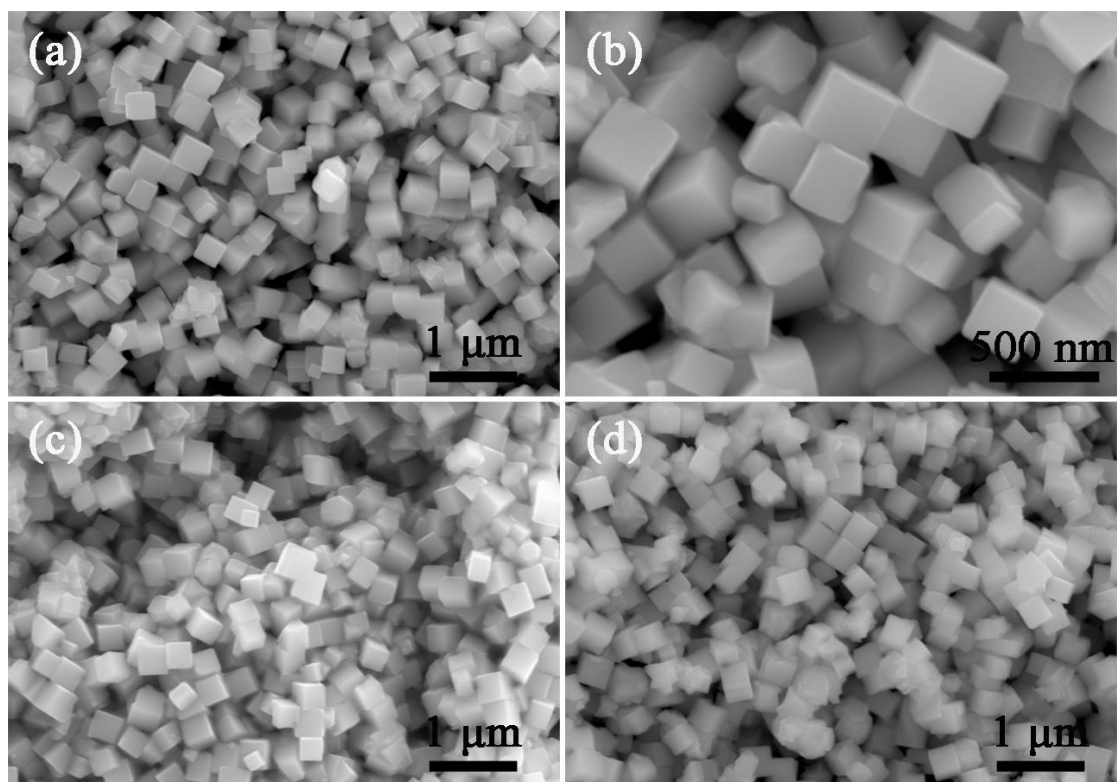

Figure S1. SEM images of (a, b)  $\text{Co}_3\text{O}_4$  (c)  $\text{S-Co}_3\text{O}_4$  and (d)  $\text{P-Co}_3\text{O}_4$ .

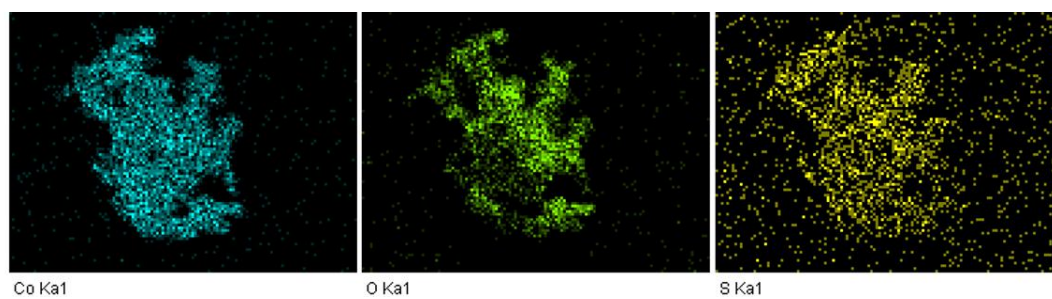

Figure S2. EDS mapping of  $\text{S-Co}_3\text{O}_4$ .

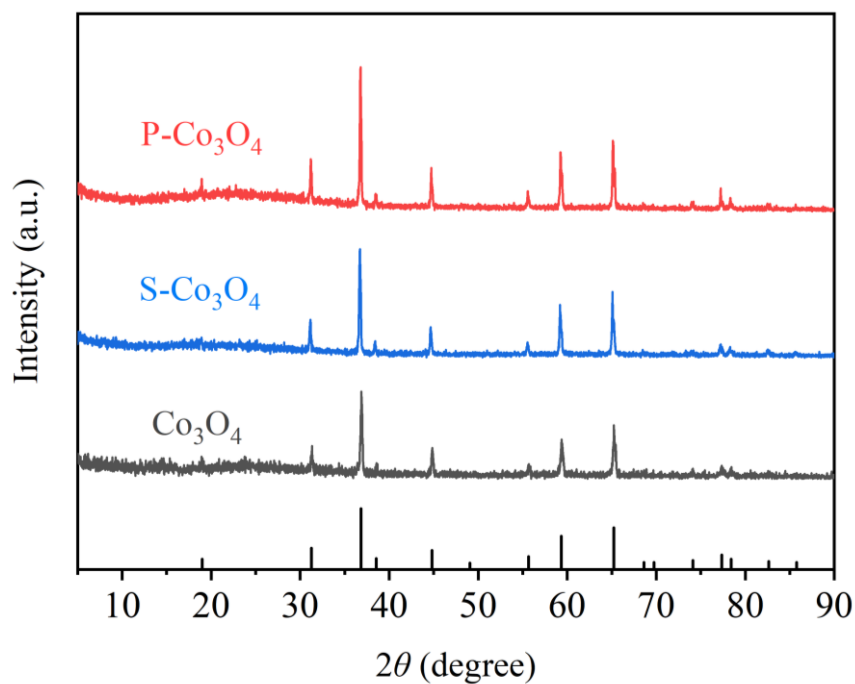

Figure S3. XRD patterns of  $\text{Co}_3\text{O}_4$ ,  $\text{S-Co}_3\text{O}_4$  and  $\text{P-Co}_3\text{O}_4$ .

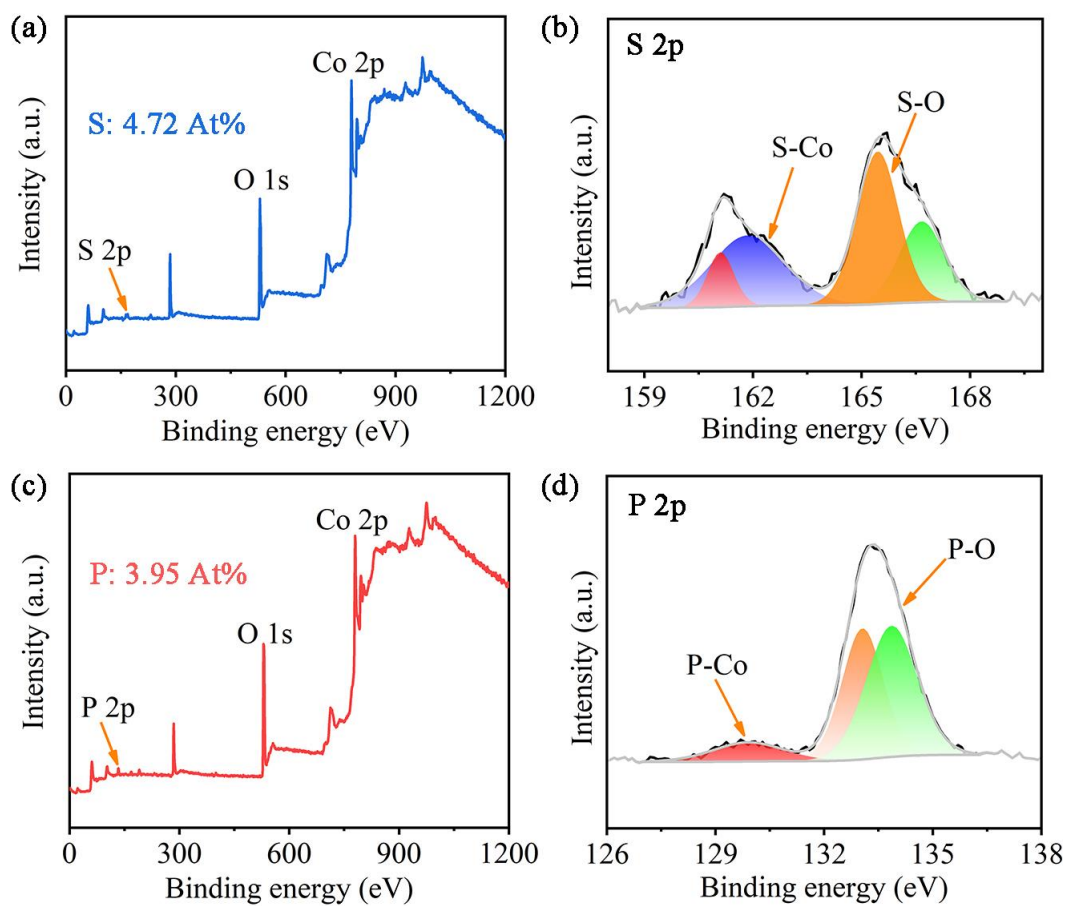

Figure S4. (a) XPS survey spectrum and (b) High-resolution XPS S 2p spectra of  $\text{S-Co}_3\text{O}_4$ . (c) XPS survey spectrum and (d) High-resolution XPS P 2p spectra of  $\text{P-Co}_3\text{O}_4$ .

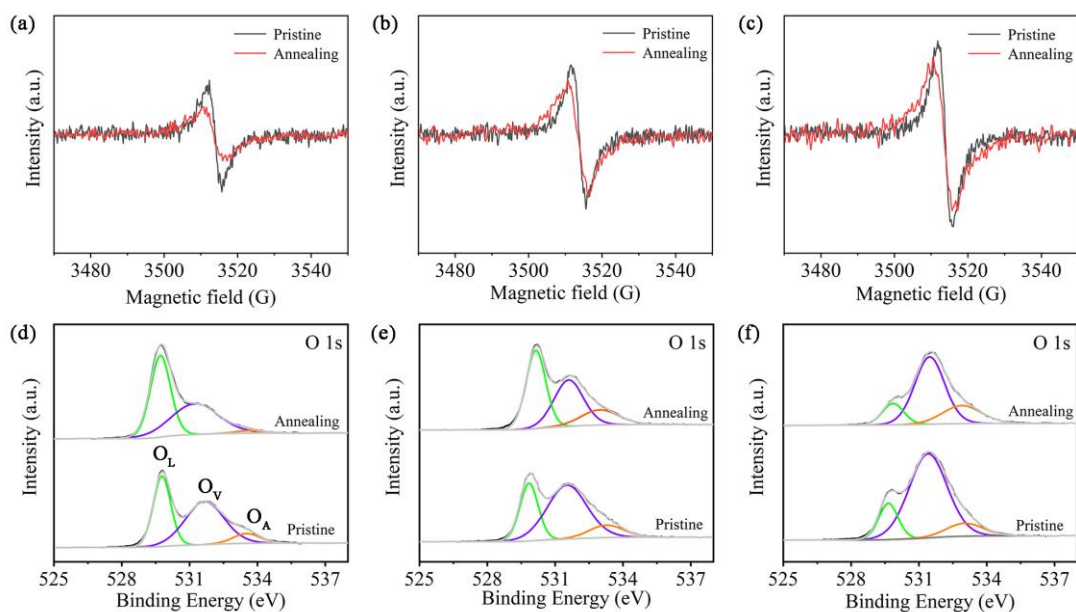

Figure S5. The characterization of stability of  $V_o$  for three samples. EPR spectra of (a)  $Co_3O_4$ , (b)  $S-Co_3O_4$  and (c)  $P-Co_3O_4$  before and after annealing in air. High-resolution XPS O 1s spectra of (a)  $Co_3O_4$ , (b)  $S-Co_3O_4$  and (c)  $P-Co_3O_4$  before and after annealing in air.

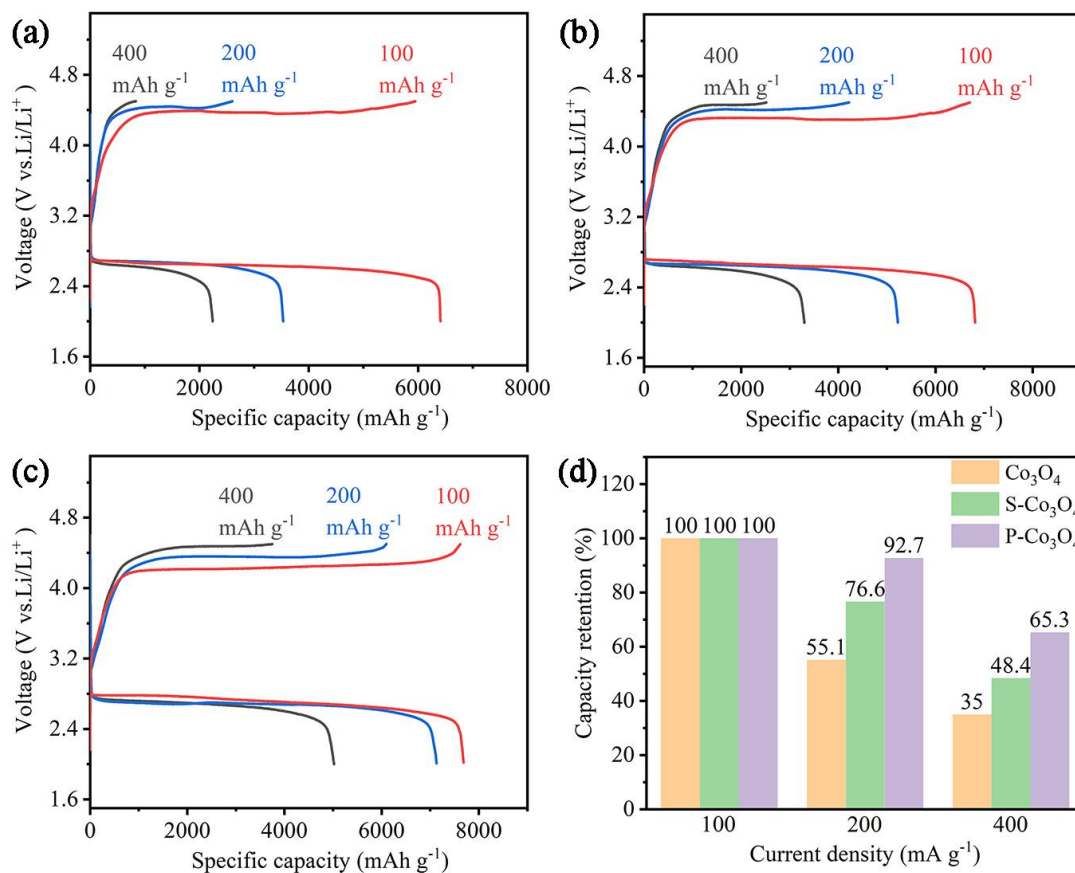

Figure S6. Discharge-charge curves at different current densities. (a)  $Co_3O_4$ . (b)  $S-Co_3O_4$ . (c)  $P-Co_3O_4$ . (d) The capacity retention of the three kinds of electrodes.

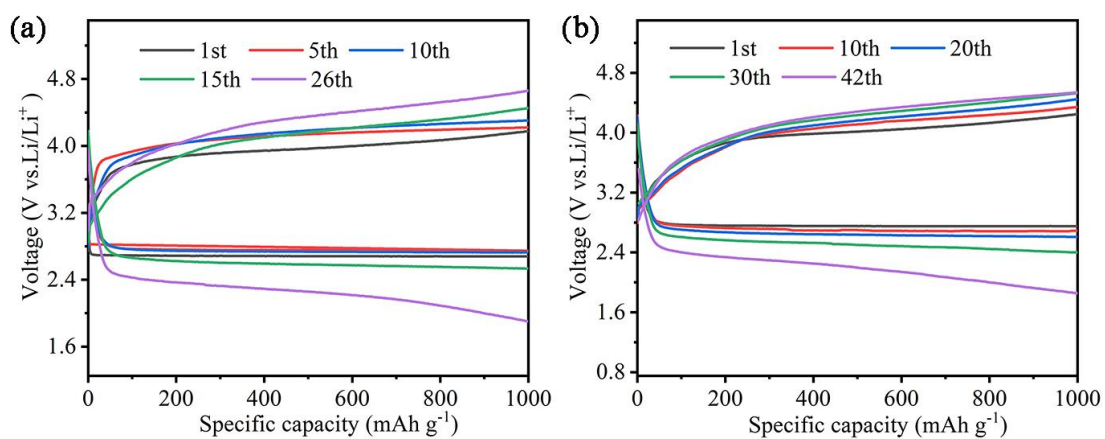

Figure S7. Discharge-charge profiles with different cycles at  $100 \text{ mA g}^{-1}$ . (a)  $\text{Co}_3\text{O}_4$ . (b)  $\text{S-Co}_3\text{O}_4$ .

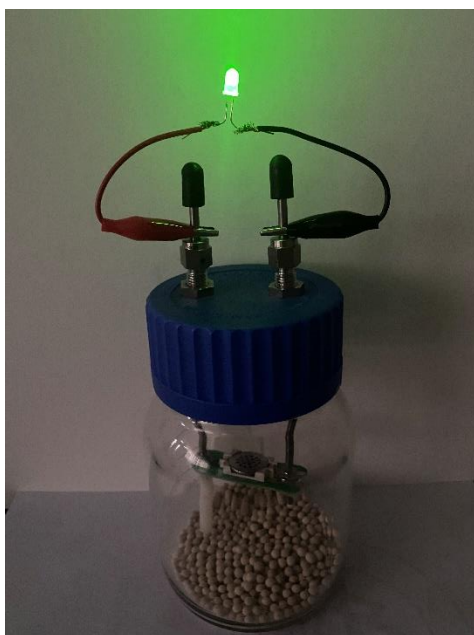

Figure S8. Photo image of the green LED powered by  $\text{P-Co}_3\text{O}_4$ -based  $\text{Li-O}_2$  battery.



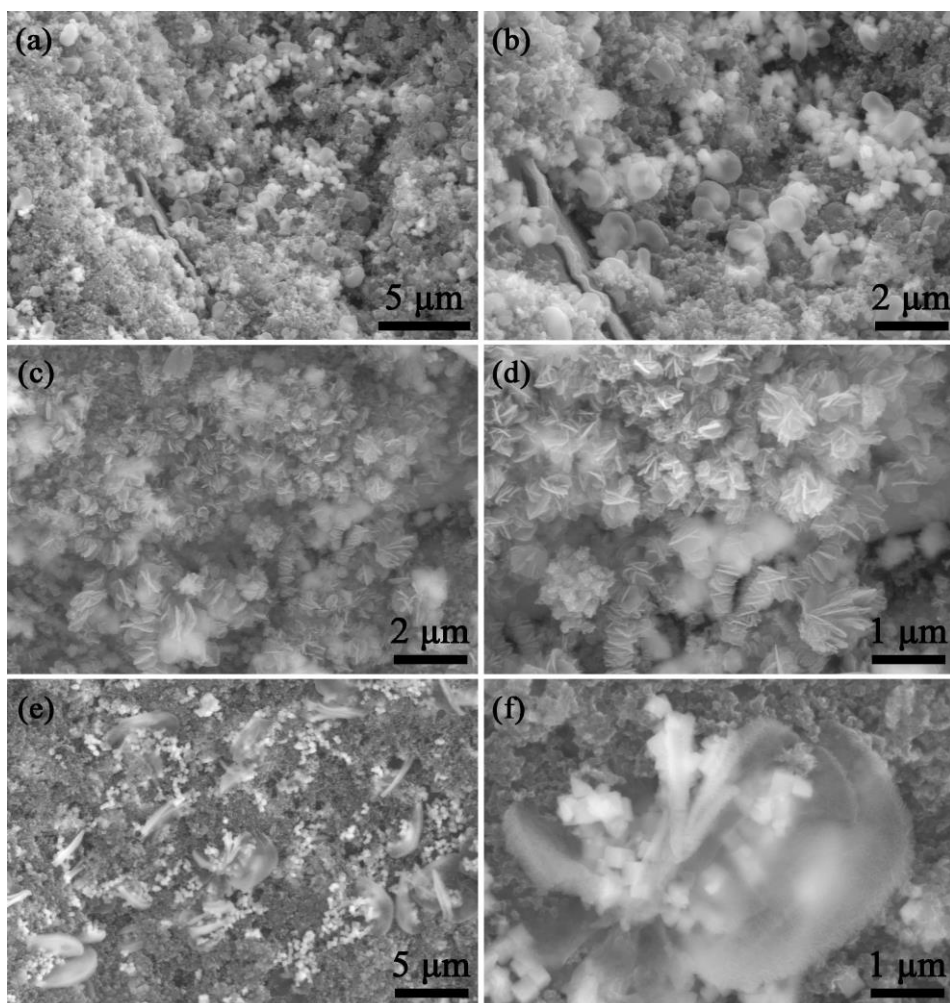

Figure S9. SEM images of three electrodes after fully discharged with different magnitude. (a, b)  $\text{Co}_3\text{O}_4$ . (c, d) S- $\text{Co}_3\text{O}_4$ . (e, f) P- $\text{Co}_3\text{O}_4$ .

Comments: The order of Figure S9 c/d and e/f is reverse. Therefore, we exchanged the the order of Figure S9 c/d and e/f. We confirm that the deletion will not do harm to the integrity and veracity of this work.

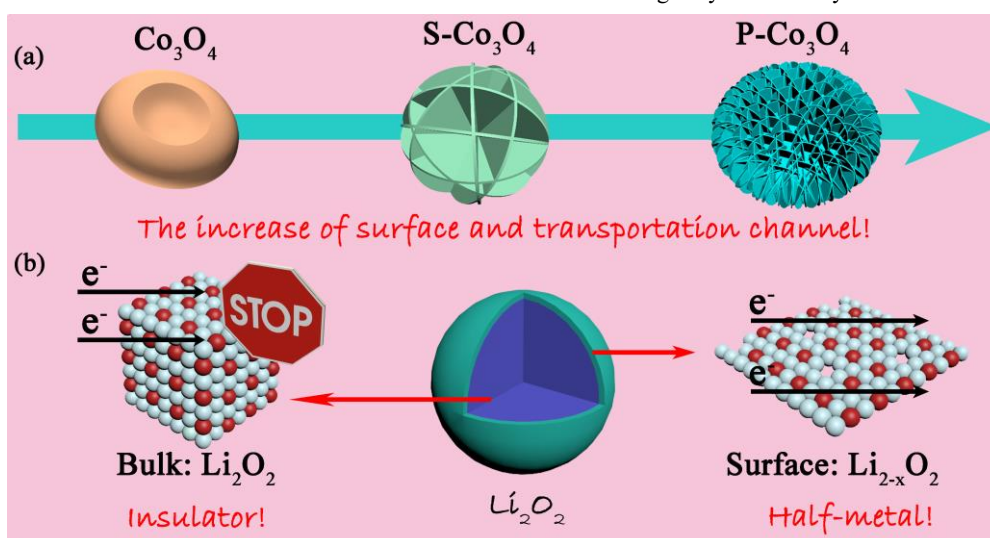

Figure S10. (a) The morphology changes of  $\text{Li}_2\text{O}_2$  for  $\text{Co}_3\text{O}_4$ , S- $\text{Co}_3\text{O}_4$  and P- $\text{Co}_3\text{O}_4$ . (b) Schematic illustration of electronic conductivity for  $\text{Li}_2\text{O}_2$  surface and inside bulk  $\text{Li}_2\text{O}_2$ .

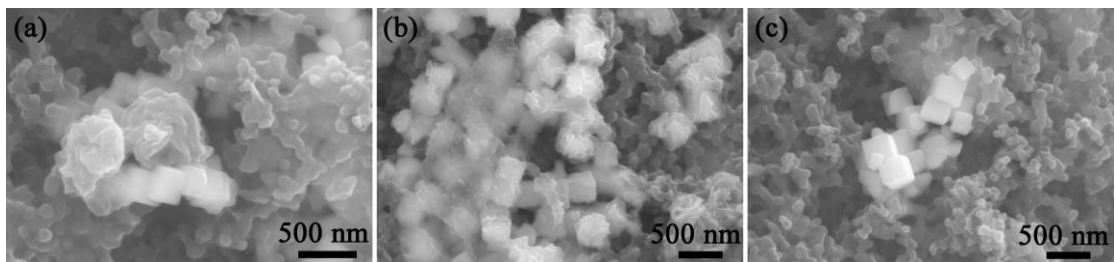

Figure S11. Ex-situ SEM images of three electrodes after fully recharged. (a)  $\text{Co}_3\text{O}_4$ . (b)  $\text{S-Co}_3\text{O}_4$  and (c)  $\text{P-Co}_3\text{O}_4$ .

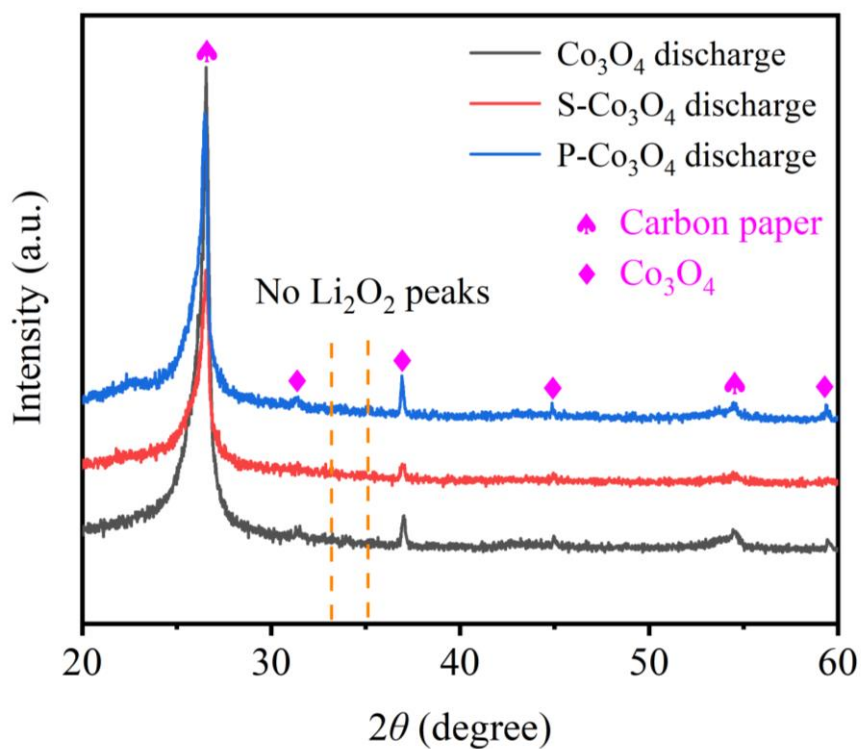

Figure S12. XRD patterns of three electrodes after first full recharge.

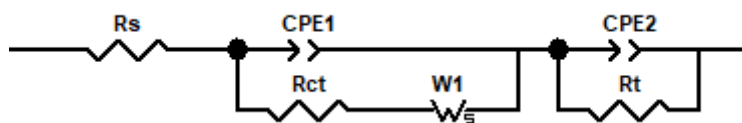

Figure S13. The corresponding equivalent circuit for EIS analysis.



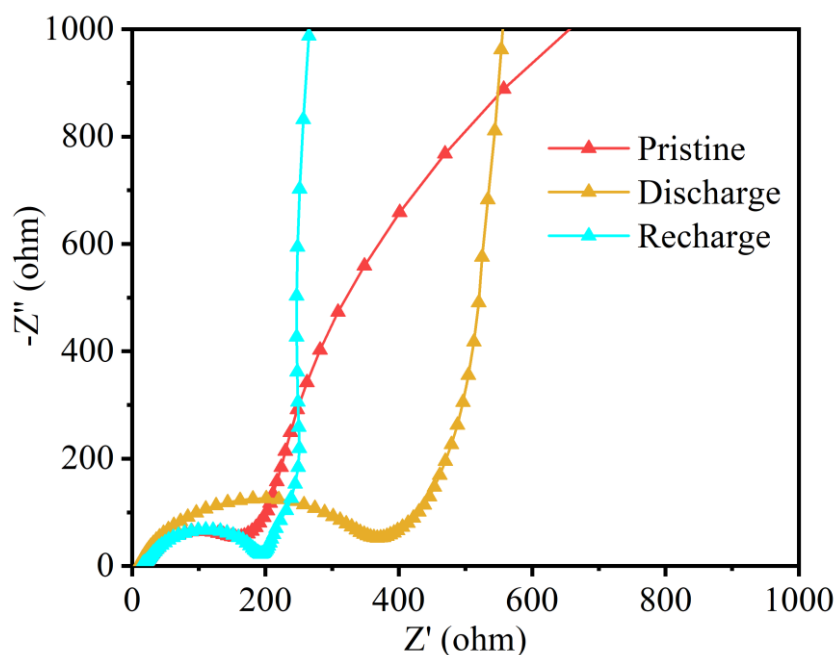

Figure S14. Nyquist plots of P-Co<sub>3</sub>O<sub>4</sub> cathode at pristine and full discharge/recharge stage.

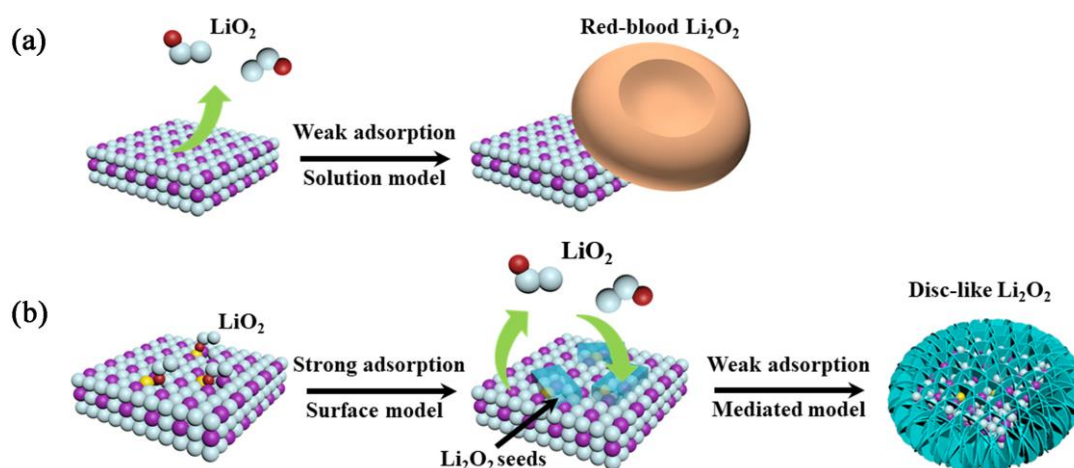

Figure S15. Schematic illustrations of the working mechanism for the (a) Co<sub>3</sub>O<sub>4</sub> and (b) P-Co<sub>3</sub>O<sub>4</sub> electrodes.

**Table S1.** Elemental contents of S-Co<sub>3</sub>O<sub>4</sub> and P-Co<sub>3</sub>O<sub>4</sub>.

| S or P (At%)                     | ICP-MS | EDS  | XPS  |
|----------------------------------|--------|------|------|
| S-Co <sub>3</sub> O <sub>4</sub> | 1.21   | 0.54 | 4.72 |
| P-Co <sub>3</sub> O <sub>4</sub> | 1.16   | 0.64 | 3.95 |

The atomic percent contents measured by ICP-ES, EDS and XPS are quite different due to their intrinsic characteristics. The elemental contents given by ICP-ES reflect the true value of entire sample. However, XPS can only measure the depth of a few nanometers of sample surface. The testing depth EDS is larger than XPS but the value measured by EDS is not accurate. In view of heteroatom doping mainly on the surface, XPS results are closer to reality of doping than ICP-MS and EDS results.

**Table S2.** Comparison of electrochemical performance between some reported Co<sub>3</sub>O<sub>4</sub>-based cathodes for Li-O<sub>2</sub> batteries.

| Catalysts                                                          | Over-potential<br>(ORR/OER) | Discharge capacity<br>(mAh g <sup>-1</sup> ) | Cycle number/<br>cutoff capacity | Reference |
|--------------------------------------------------------------------|-----------------------------|----------------------------------------------|----------------------------------|-----------|
| Co <sub>3</sub> O <sub>4</sub> -(111)                              | ~1.5                        | 2463                                         | 20/1000                          | 5         |
| Co <sub>3</sub> O <sub>4</sub> NS                                  | -                           | 11882                                        | 80/500                           | 6         |
| Co <sub>3</sub> O <sub>4</sub> NFs/GNF                             | 1.26                        | 10500                                        | 80/1000                          | 7         |
| Co <sub>3</sub> O <sub>4</sub> -H                                  | ~1.7                        | 5220                                         | 110/500                          | 8         |
| Co <sub>3</sub> O <sub>4</sub> -(112)                              | ~1.3                        | 9144                                         | 50/500                           | 9         |
| Co <sub>3</sub> O <sub>4</sub> @Co <sub>3</sub> O <sub>4</sub> /Ag | ~1.5                        | 12000                                        | 80/1000                          | 10        |
| P-Co <sub>3</sub> O <sub>4</sub>                                   | 1.2                         | 7690                                         | 90/1000                          | This      |

## References

1. Feng, J.; Zeng, H. Size-Controlled Growth of Co<sub>3</sub>O<sub>4</sub> Nanocubes. *Chemistry of Materials* **2003**, *15*, 2829-2835.
2. Xiao, X.; Liu, X.; Zhao, H.; Chen, D.; Liu, F.; Xiang, J.; Hu, Z.; Li, Y. Facile shape control of Co<sub>3</sub>O<sub>4</sub> and the effect of the crystal plane on electrochemical performance. *Advanced materials* **2012**, *24*, 5762-5766.
3. Jiang, Z.-L.; Xu, G.-L.; Yu, Z.; Zhou, T.-H.; Shi, W.-K.; Luo, C.-S.; Zhou, H.-J.; Chen, L.-B.; Sheng, W.-J.; Zhou, M. High rate and long cycle life in Li-O<sub>2</sub> batteries with highly efficient catalytic cathode configured with Co<sub>3</sub>O<sub>4</sub> nanoflower. *Nano Energy* **2019**, *64*, 103896.
4. Lin, X.; Yuan, R.; Cai, S.; Jiang, Y.; Lei, J.; Liu, S.-G.; Wu, Q.-H.; Liao, H.-G.; Zheng, M.; Dong, Q. An Open-Structured Matrix as Oxygen Cathode with High Catalytic Activity and Large Li<sub>2</sub>O<sub>2</sub> Accommodations for Lithium-Oxygen Batteries. *Advanced Energy Materials* **2018**, *8*, 1800089.
5. Gao, R.; Zhu, J.; Xiao, X.; Hu, Z.; Liu, J.; Liu, X. Facet-Dependent Electrocatalytic Performance of Co<sub>3</sub>O<sub>4</sub> for Rechargeable Li-O<sub>2</sub> Battery. *The Journal of Physical Chemistry C* **2015**, *119*, 4516-4523.
6. Wu, F.; Zhang, X.; Zhao, T.; Chen, R.; Ye, Y.; Xie, M.; Li, L. Hierarchical mesoporous/macroporous Co<sub>3</sub>O<sub>4</sub> ultrathin nanosheets as free-standing catalysts for rechargeable lithium-oxygen batteries. *Journal of Materials Chemistry A* **2015**, *3*, 17620-17626.
7. Ryu, W. H.; Yoon, T. H.; Song, S. H.; Jeon, S.; Park, Y. J.; Kim, I. D. Bifunctional composite catalysts using Co<sub>3</sub>O<sub>4</sub> nanofibers immobilized on nonoxidized graphene nanoflakes for high-capacity and long-cycle Li-O<sub>2</sub> batteries. *Nano letters* **2013**, *13*, 4190-4197.
8. Zheng, Y.; Gao, R.; Zheng, L.; Sun, L.; Hu, Z.; Liu, X. Ultrathin Co<sub>3</sub>O<sub>4</sub> Nanosheets with Edge-Enriched {111} Planes as Efficient Catalysts for Lithium-Oxygen Batteries. *ACS Catalysis* **2019**, *9*, 3773-3782.
9. He, M.; Zhang, P.; Xu, S.; Yan, X. Morphology Engineering of Co<sub>3</sub>O<sub>4</sub> Nanoarrays as Free-Standing Catalysts for Lithium-Oxygen Batteries. *ACS applied materials & interfaces* **2016**, *8*, 23713-23720.
10. Gao, R.; Yang, Z.; Zheng, L.; Gu, L.; Liu, L.; Lee, Y.; Hu, Z.; Liu, X. Enhancing the Catalytic Activity of Co<sub>3</sub>O<sub>4</sub> for Li-O<sub>2</sub> Batteries through the Synergy of Surface/Interface/Doping Engineering. *ACS Catalysis* **2018**, *8*, 1955-1963.
